# Supplementary material for: Ultra-small-sized multi-element metal oxide nanofibers: an efficient electrocatalyst for hydrogen evolution
Source: Royal Society of Chemistry journal article supplement (doi:10.1039/d2na00100d), 2022-01-01
Supplement: d2na00100d1.pdf [file d2na00100d1.pdf]

## Supporting Information

### **Multi-Element Metal Oxide Ultra-small-sized Nanofibers: An Efficient Electrocatalyst for Hydrogen Evolution**

*Peng Liu<sup>a</sup>, Changchun Sun<sup>a</sup>, Guiju Liu<sup>b</sup>, Zhan Jiang<sup>a,\*</sup>, Haiguang Zhao<sup>a,b,\*</sup>*

<sup>a</sup> College of Textiles & Clothing, Qingdao University, No. 308 Ningxia Road, Qingdao 266071, P.R. China

<sup>b</sup> College of Physics and State Key Laboratory of Bio-Fibers and Eco-Textiles, Qingdao University, No. 308 Ningxia Road, Qingdao 266071, P.R. China

\*Corresponding author. Email: kevinjiang\_1987@126.com; hgzhao@qdu.edu.cn

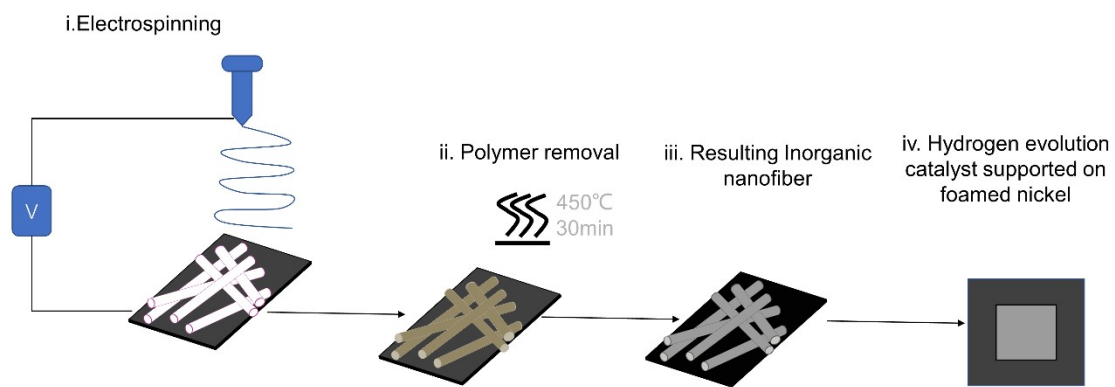

**Figure S1.** Scheme showing the methodology we used in this work for fabricating the metal oxide nanofibers.

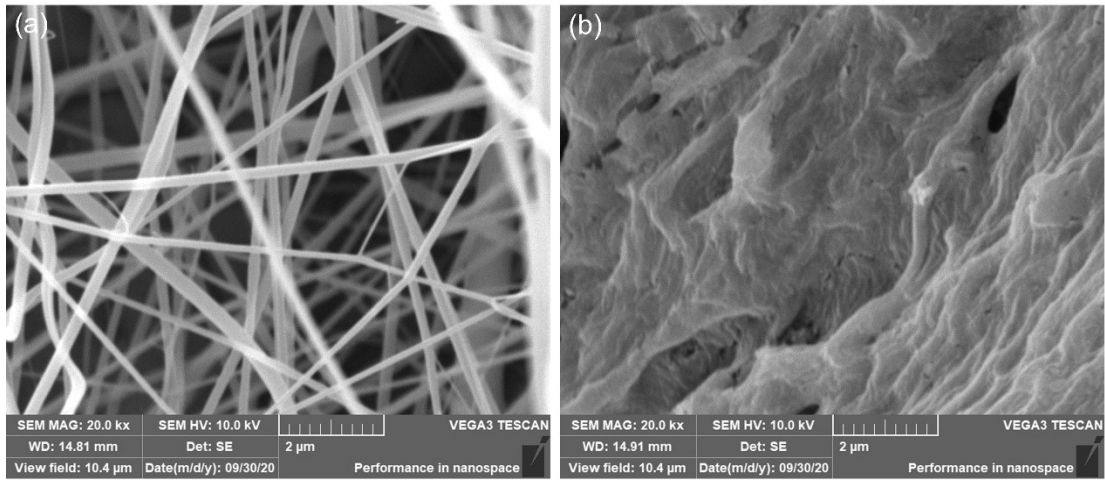

**Figure S2** SEM images of CoO sample: (a) before and (b) after sintering at 450 °C.

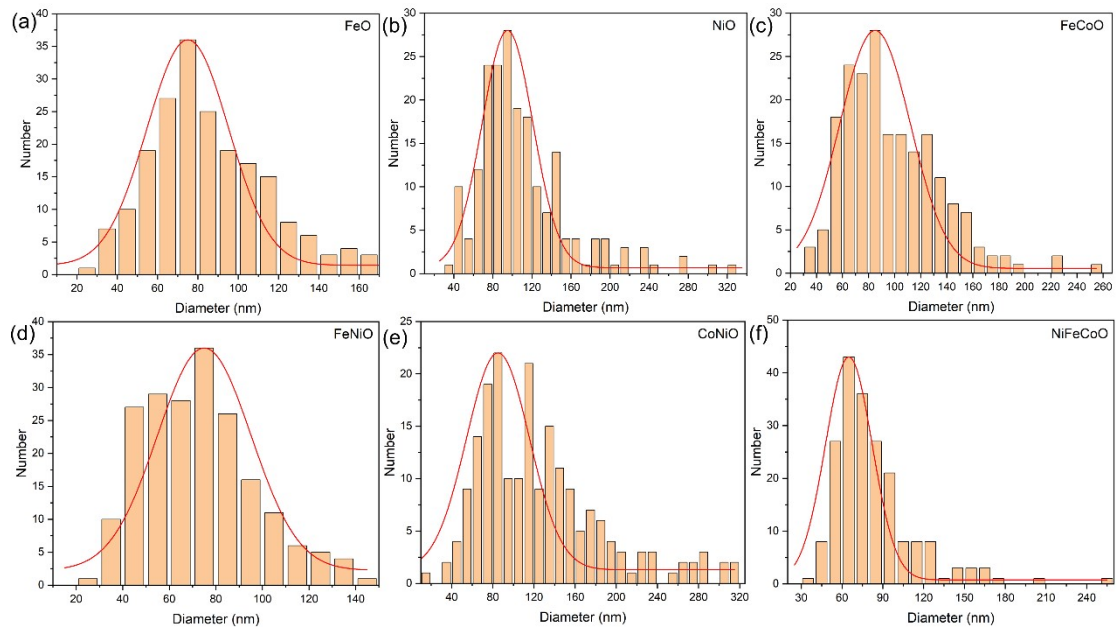

**Figure S3.** Diameters of the FeO, NiO, FeCoO, FeNiO, CoNiO, and NiFeCoO nanofibers.

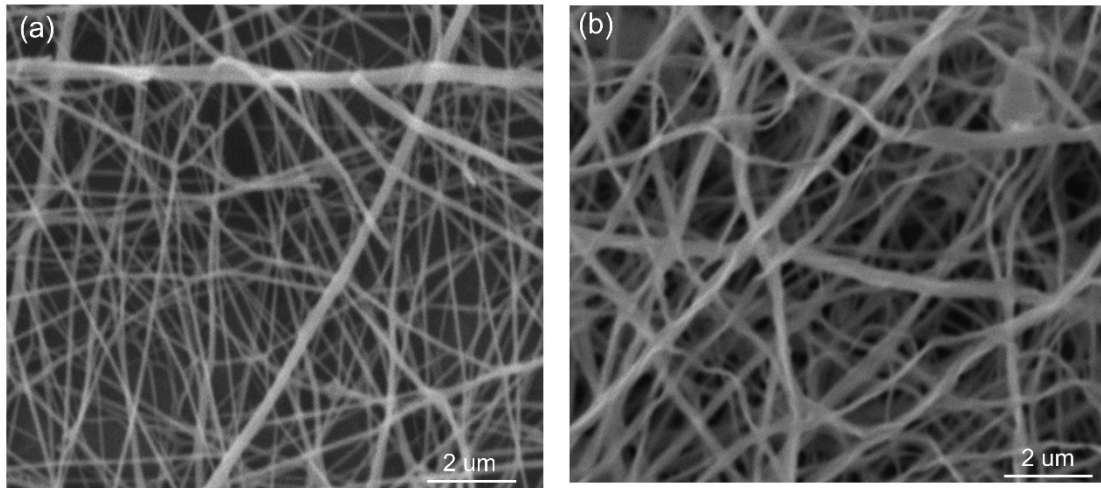

**Figure S4.** SEM images of (a) FeO and (b) NiO samples.

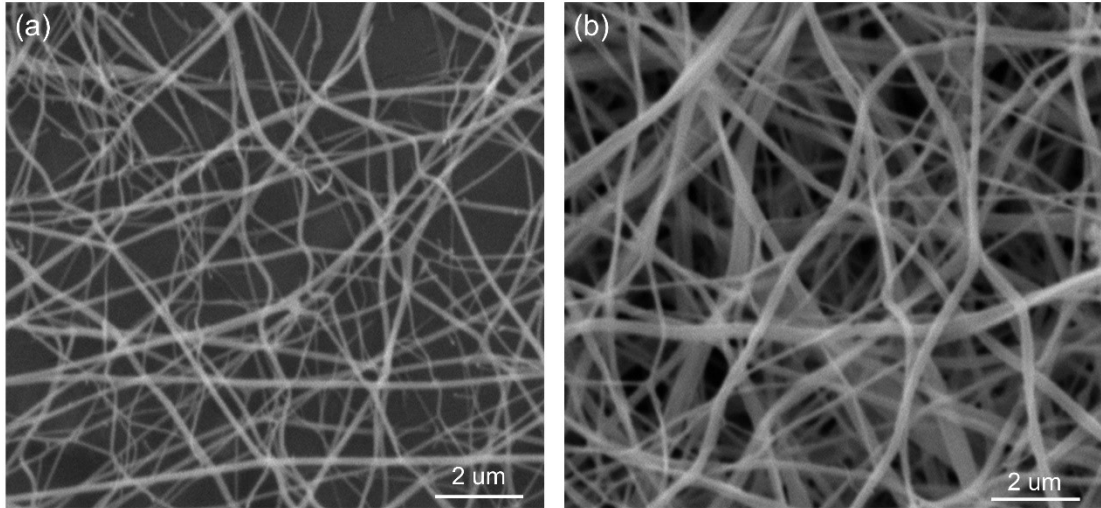

**Figure S5.** SEM images of (a) FeNiO and (b) CoNiO samples.

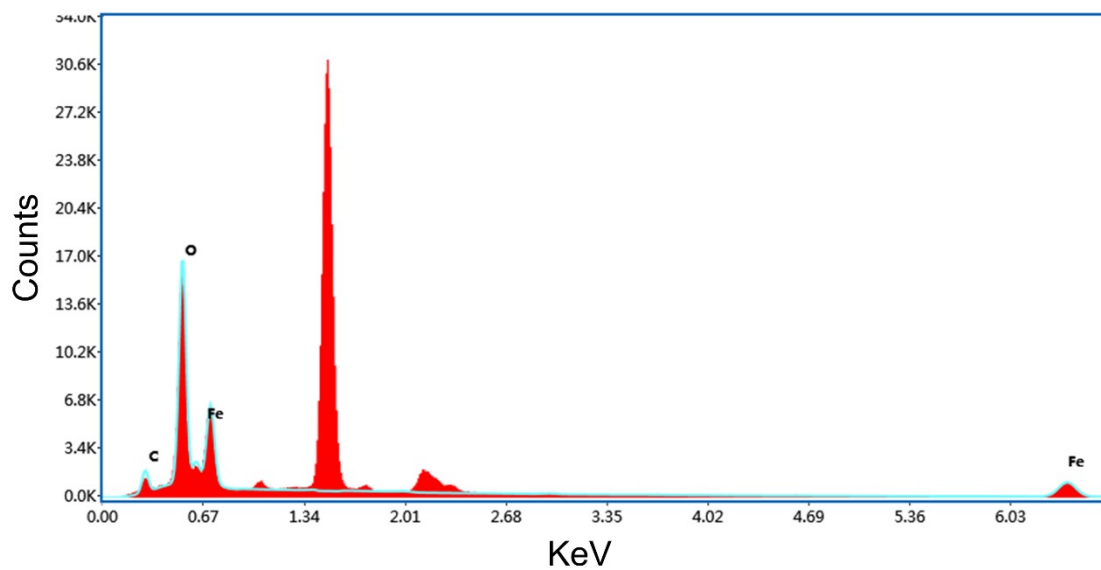

**Figure S6.**EDX spectrum of the FeO sample.

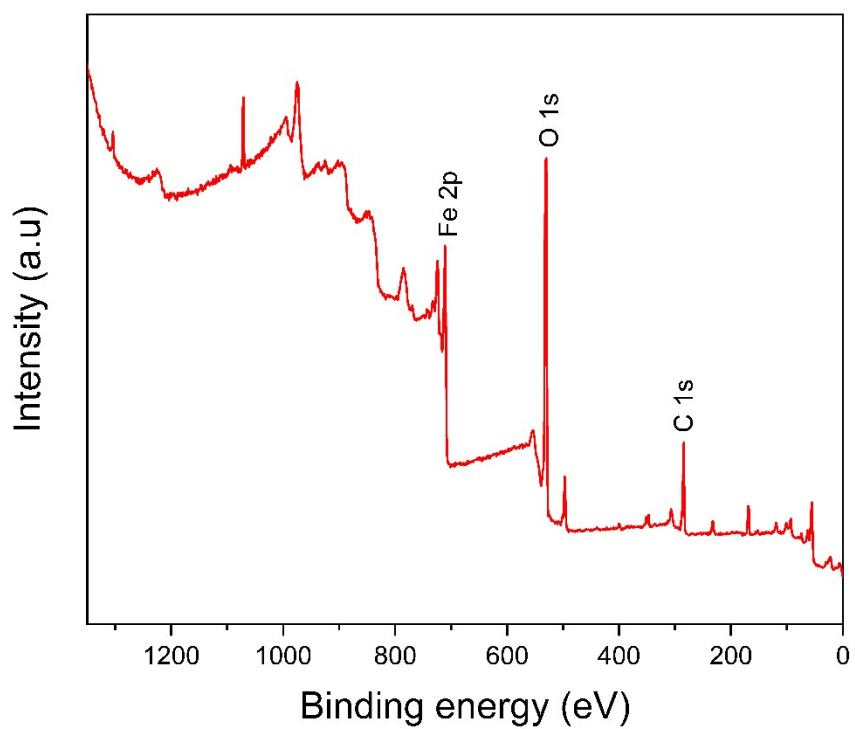

**Figure S7.** Typical XPS survey spectrum of FeO sample.

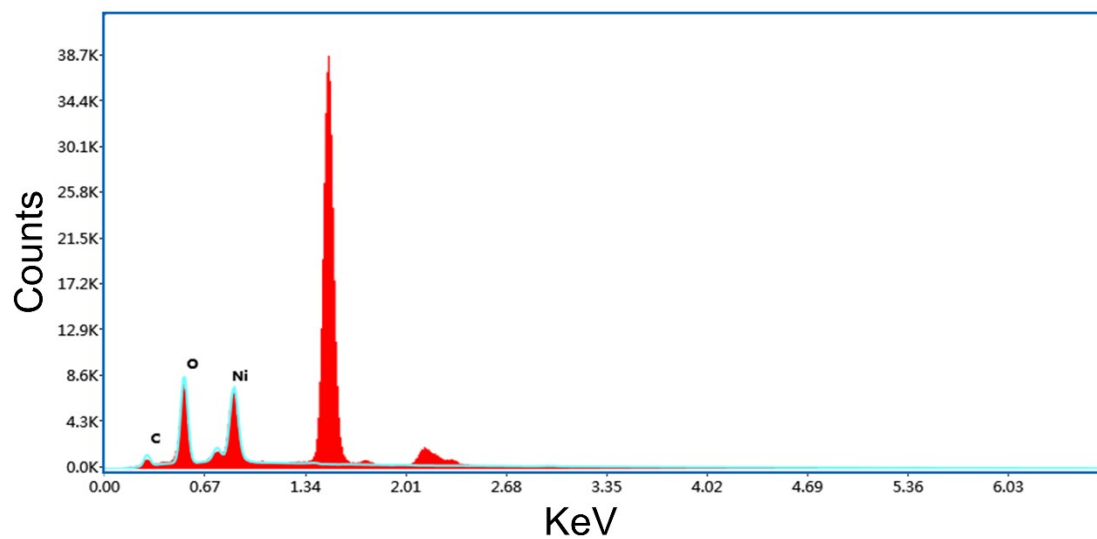

**Figure S8.**EDX spectrum of the NiO sample.

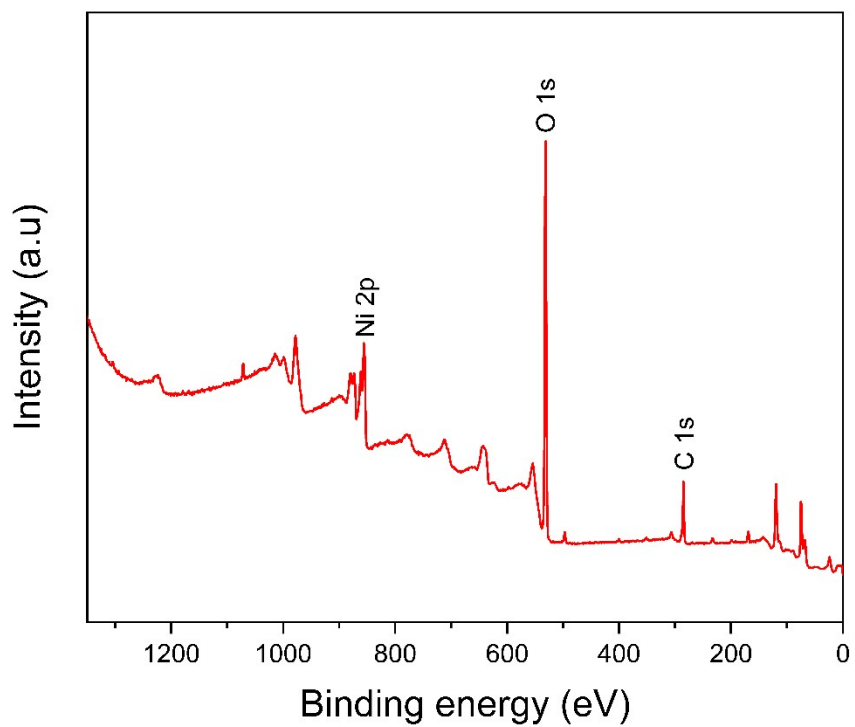

**Figure S9.** Typical XPS survey spectrum of NiO sample.



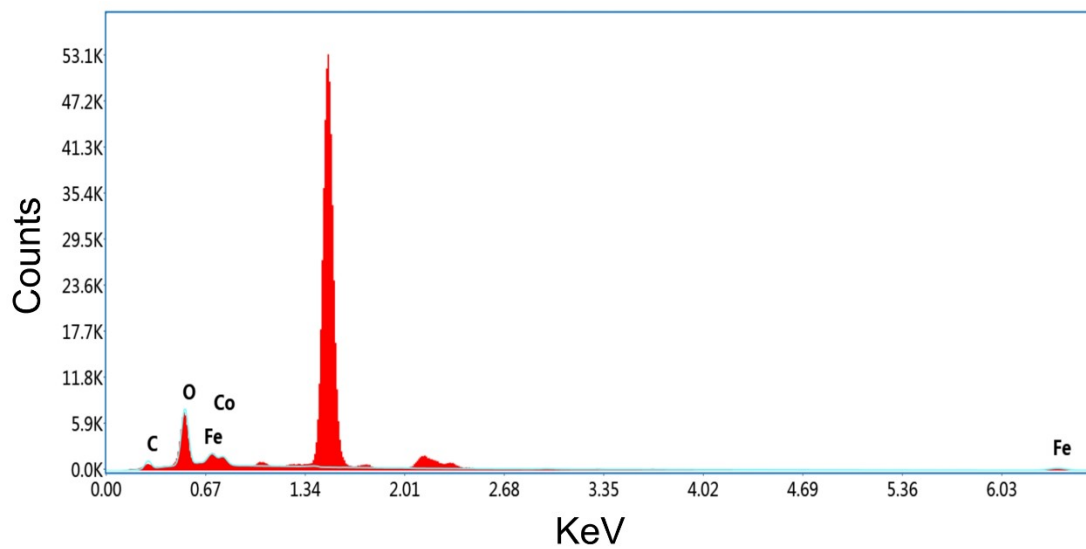

**Figure S10.**EDX spectrum of the FeCoO sample.

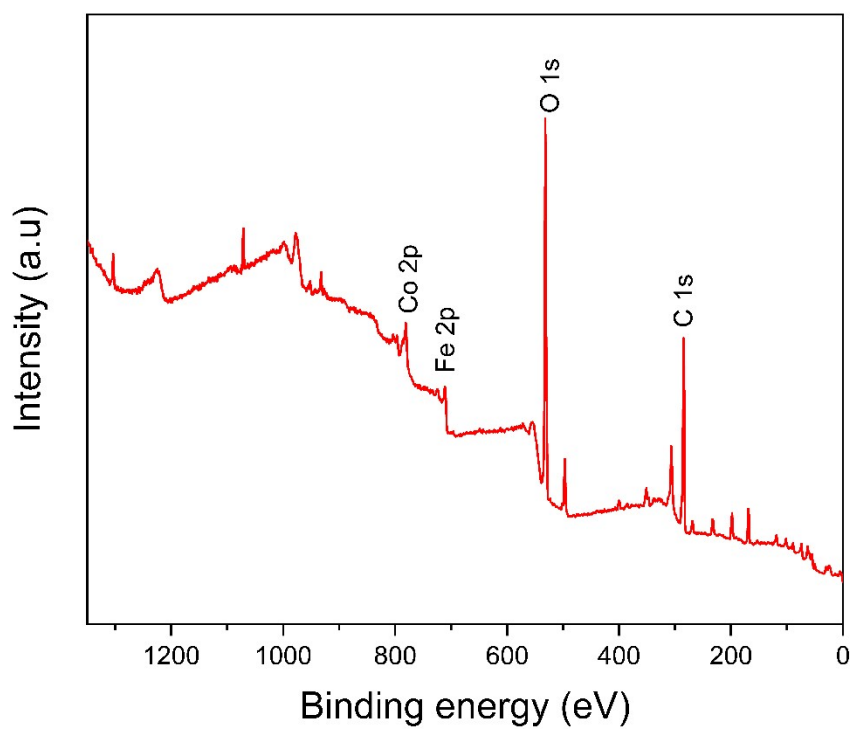

**Figure S11.** Typical XPS survey spectrum of FeCoO sample.

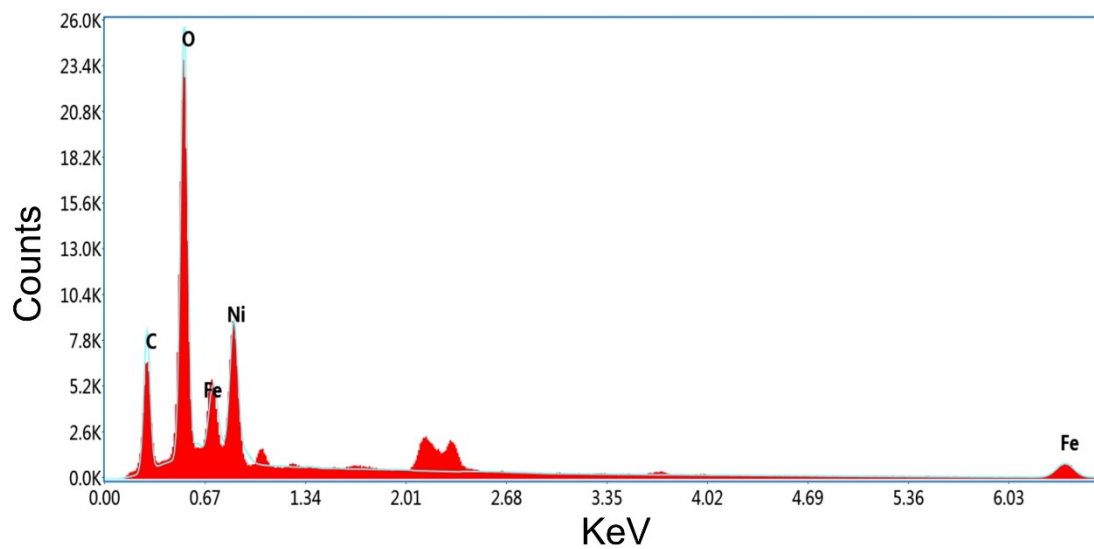

**Figure S12.**EDX spectrum of the FeNiO sample.

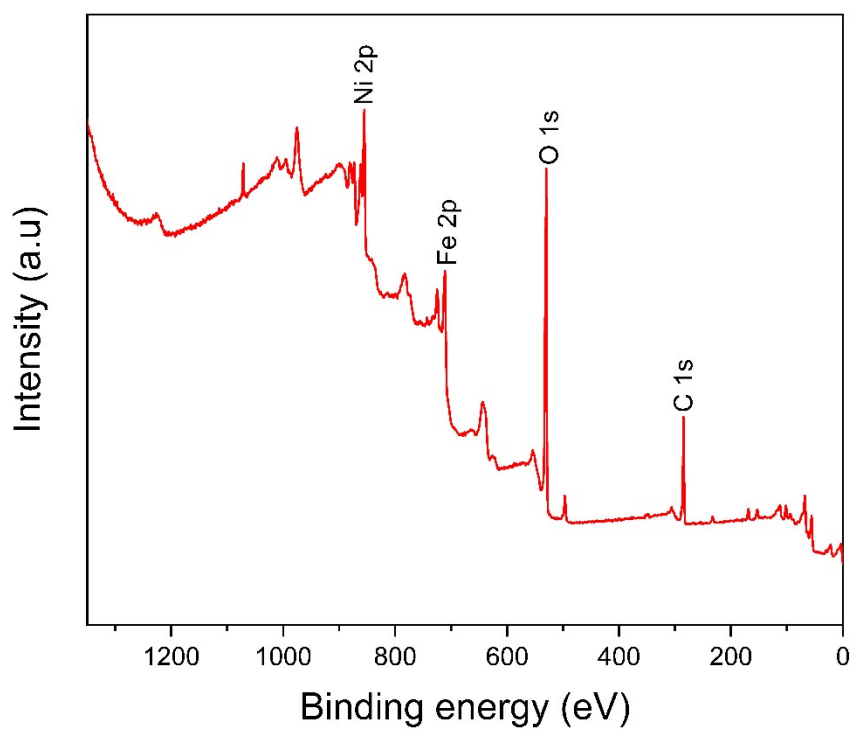

**Figure S13.** Typical XPS survey spectrum of FeNiO sample.

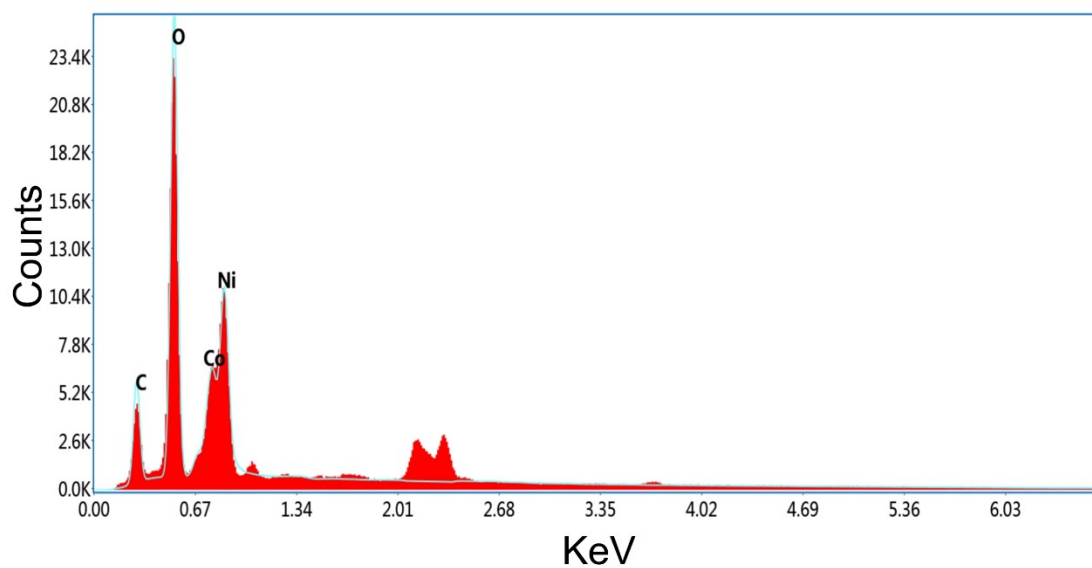

**Figure S14.**EDX spectrum of the CoNiO sample.

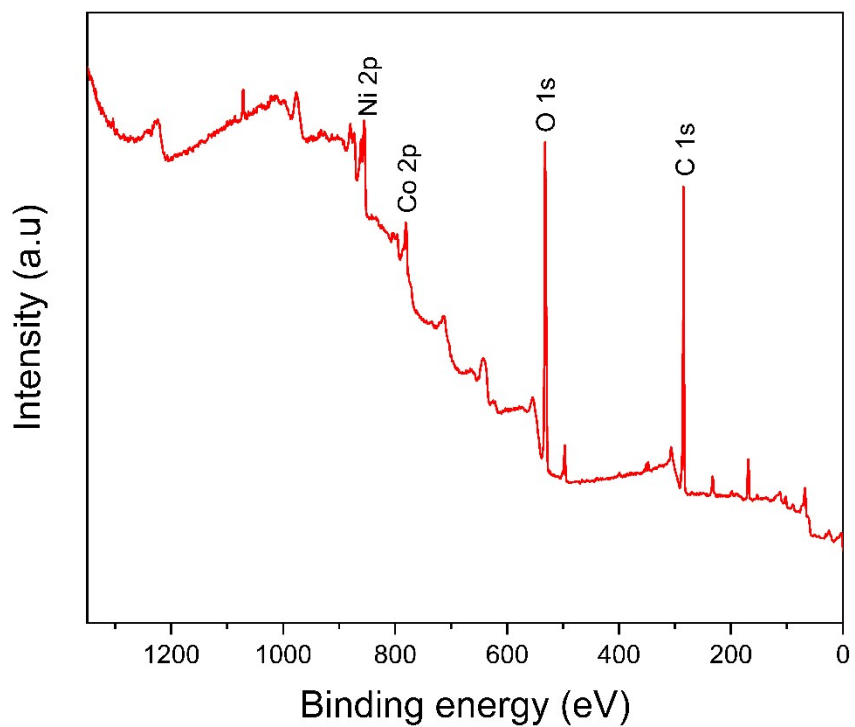

**Figure S15.** Typical XPS survey spectrum of CoNiO sample.

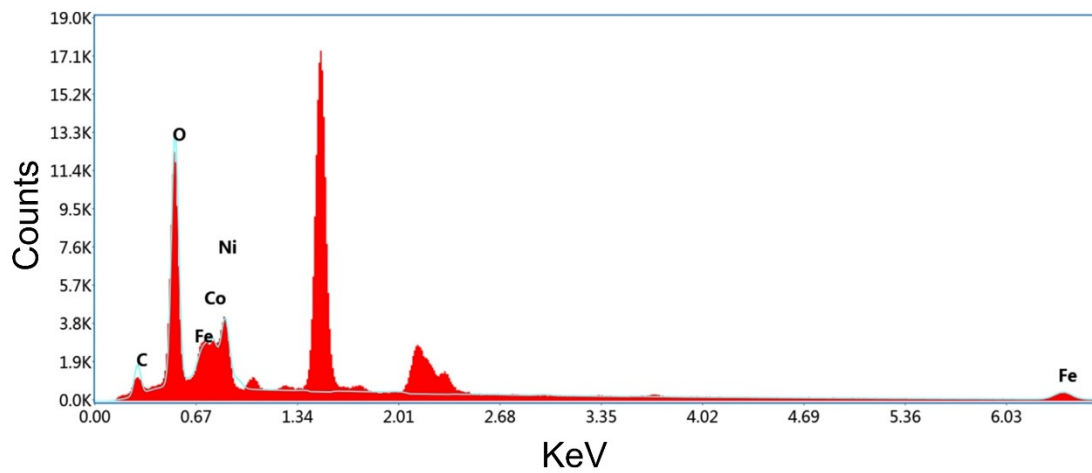

**Figure S16.**EDX spectrum of the NiFeCoO sample.

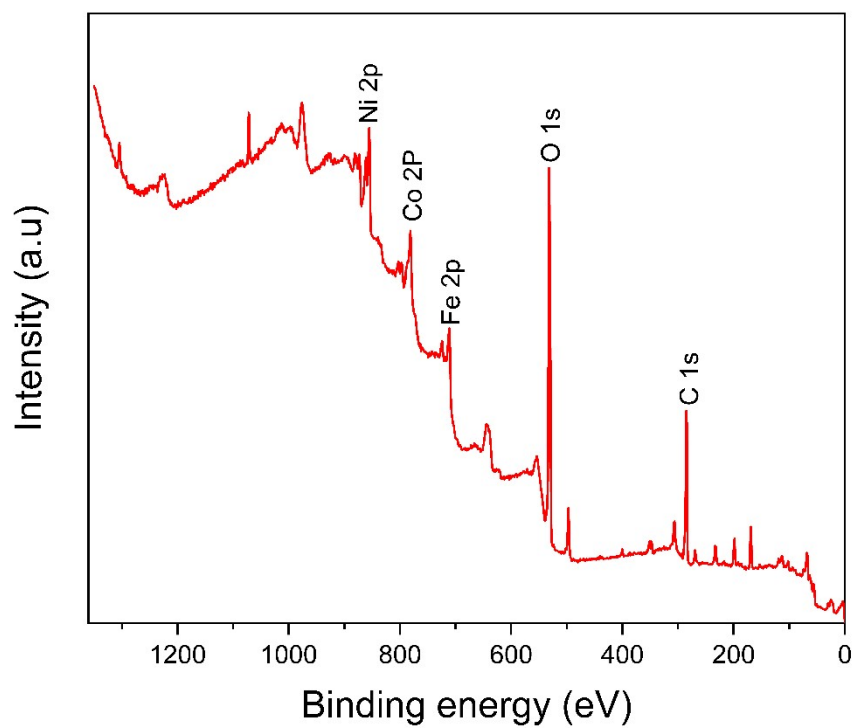

**Figure S17.** Typical XPS survey spectrum of NiFeCoO sample.

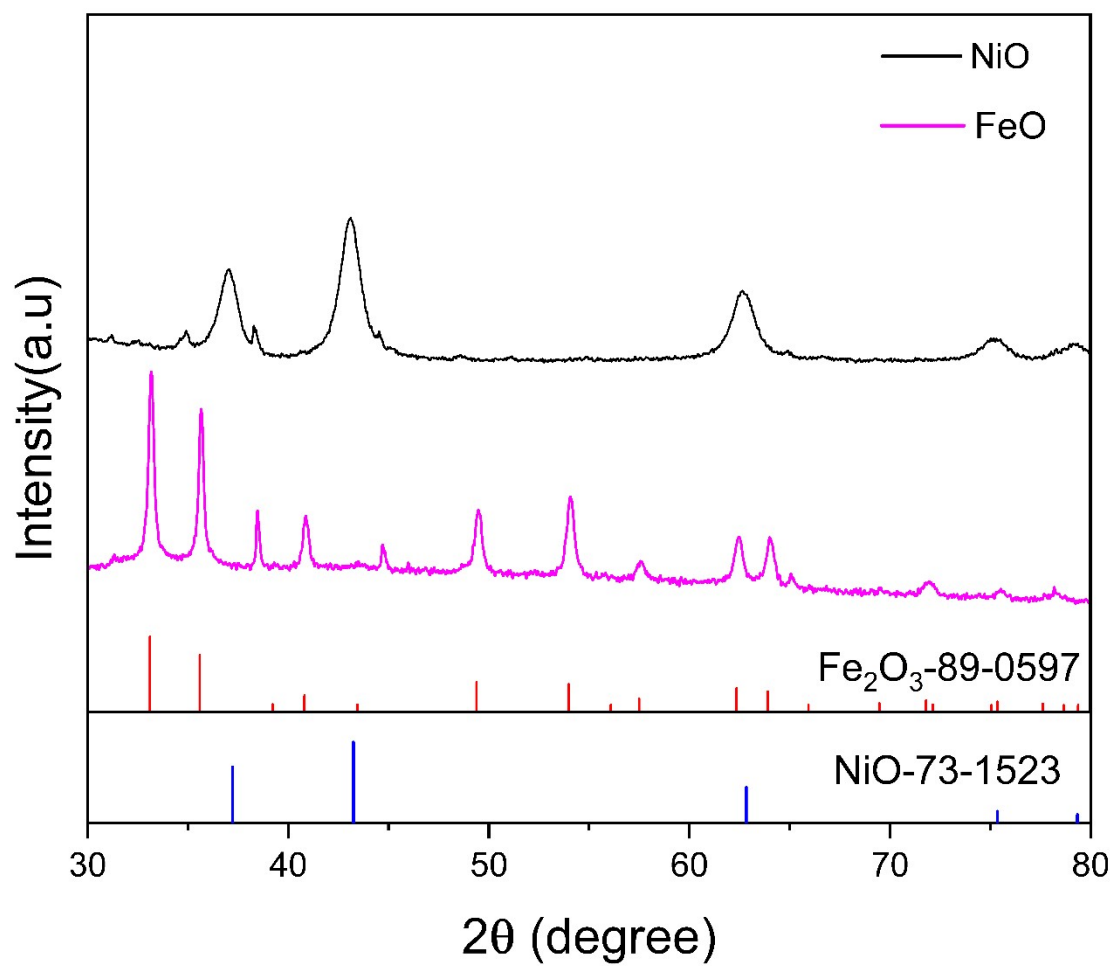

**Figure S18.** XRD patterns of FeO and NiO samples.

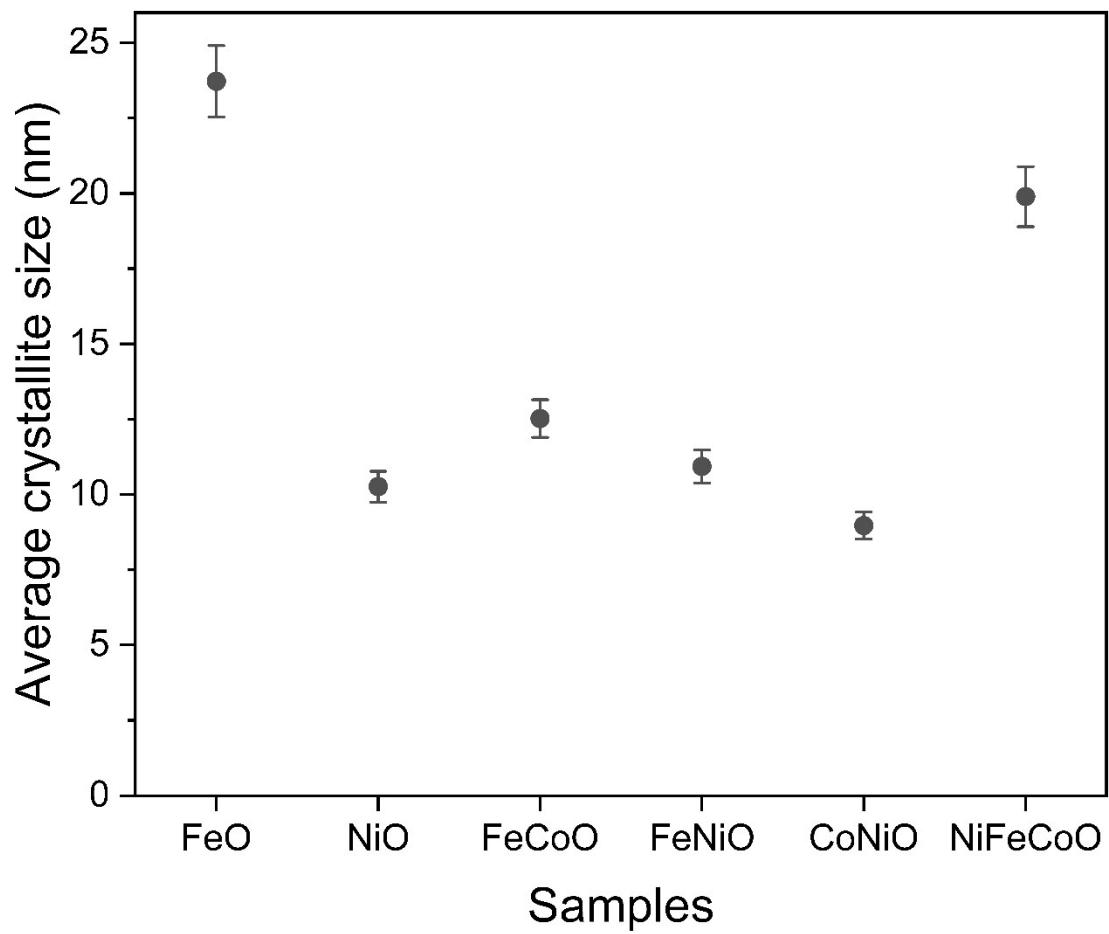

**Figure S19.** Average crystallite size of the FeO, NiO, FeCoO, FeNiO, CoNiO, and NiFeCoO samples.

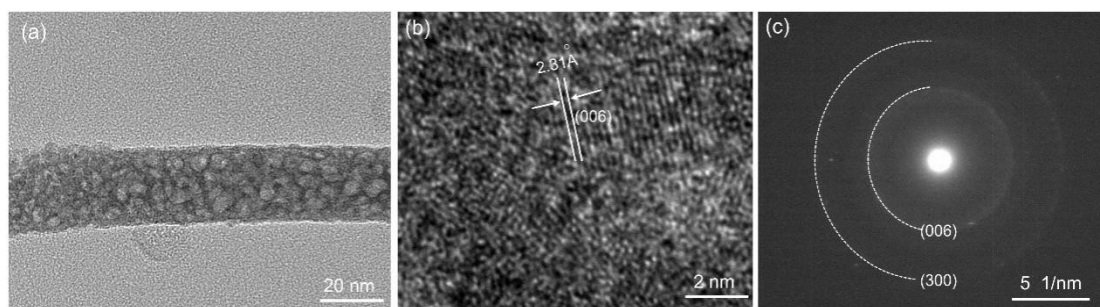

**Figure S20.** (a) TEM image of FeO sample. (b) HRTEM image of FeO sample. (c) SAED of FeO sample.

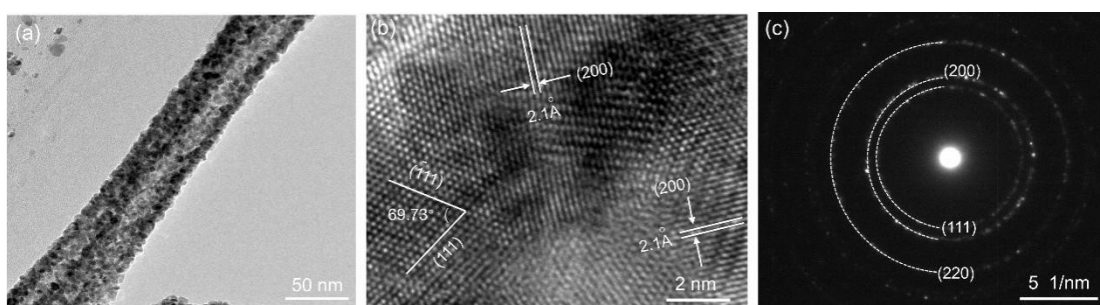

**Figure S21.** (a) TEM image of NiO sample. (b) HRTEM image of NiO sample. (c) SAED of NiO sample.

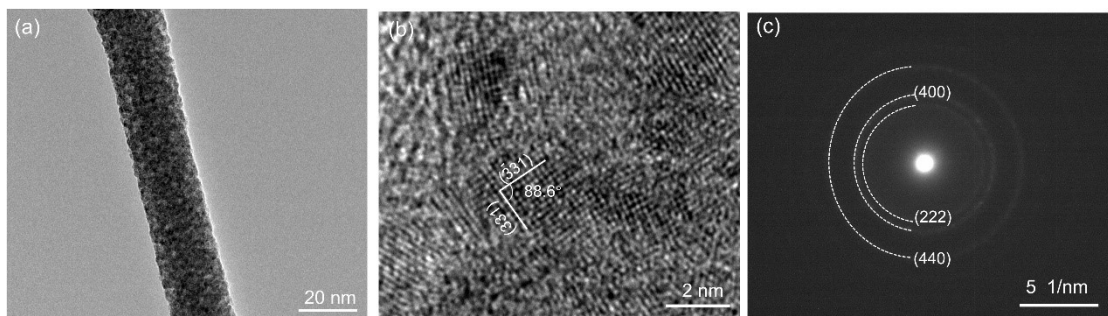

**Figure S22.** (a) TEM image of FeNiO sample. (b) HRTEM image of FeNiO sample. (c) SAED of FeNiO sample.

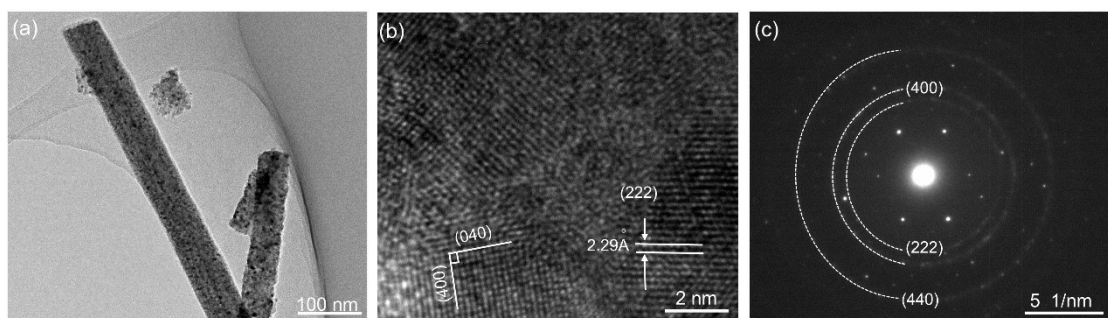

**Figure S23.** (a) TEM image of CoNiO sample. (b) HRTEM image of CoNiO sample. (c) SAED of CoNiO sample.



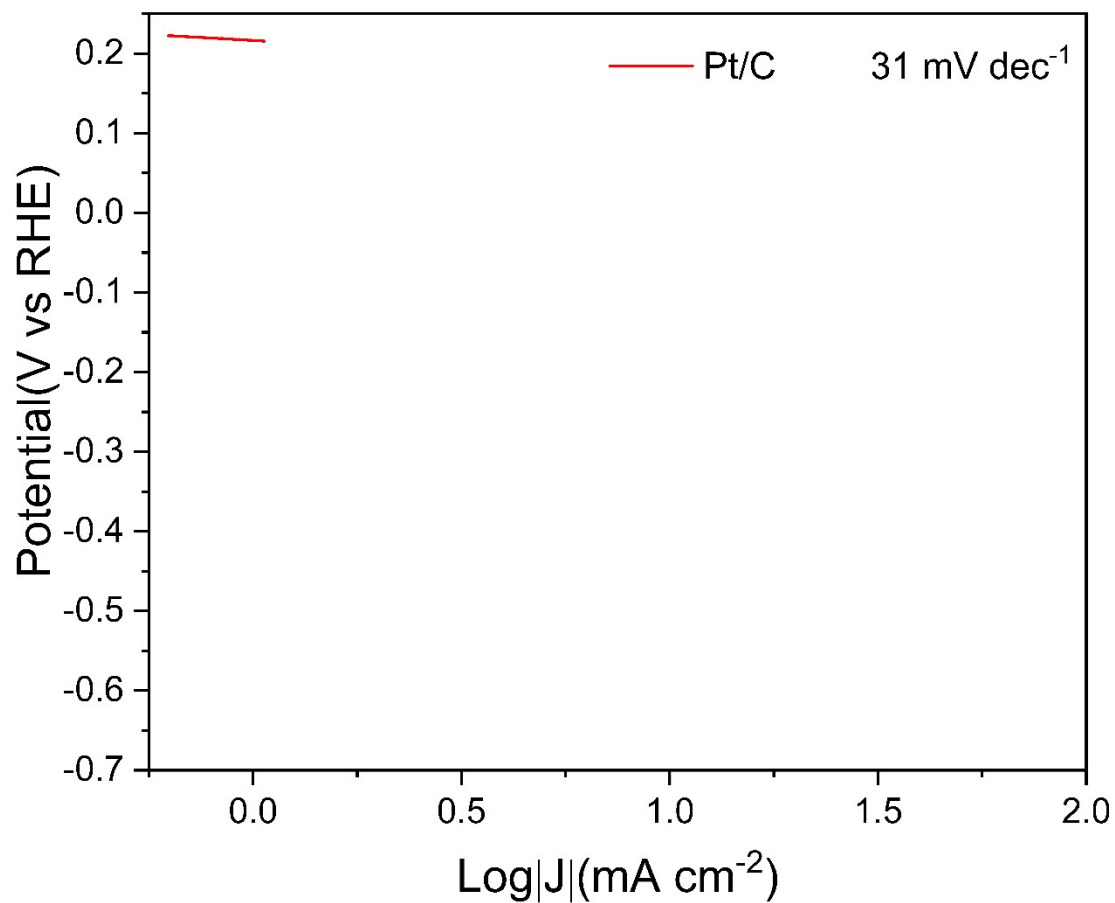

**Figure S24.** Tafel plots of Pt/C in 1.0 M KOH.

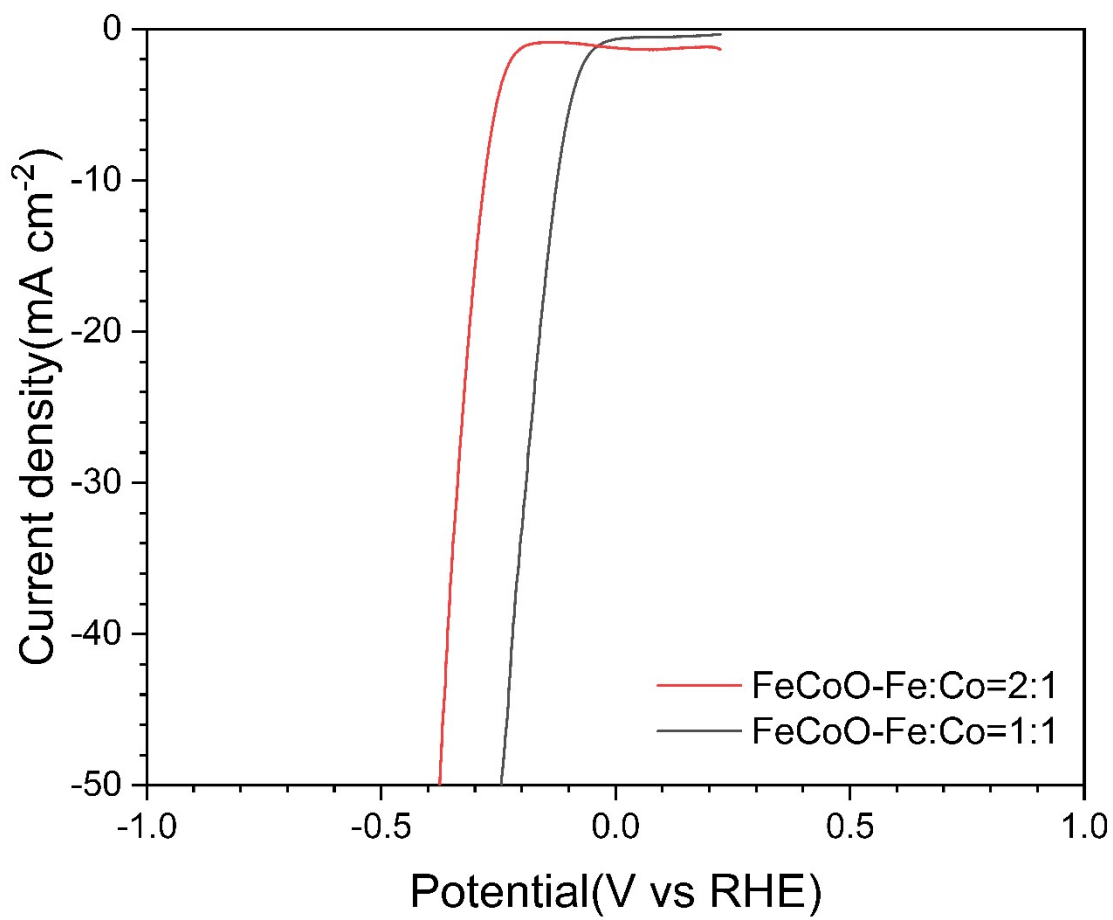

**Figure S25.** Polarization curves for FeCoO samples with identical Fe content, but different cobalt contents in 1.0 M KOH.

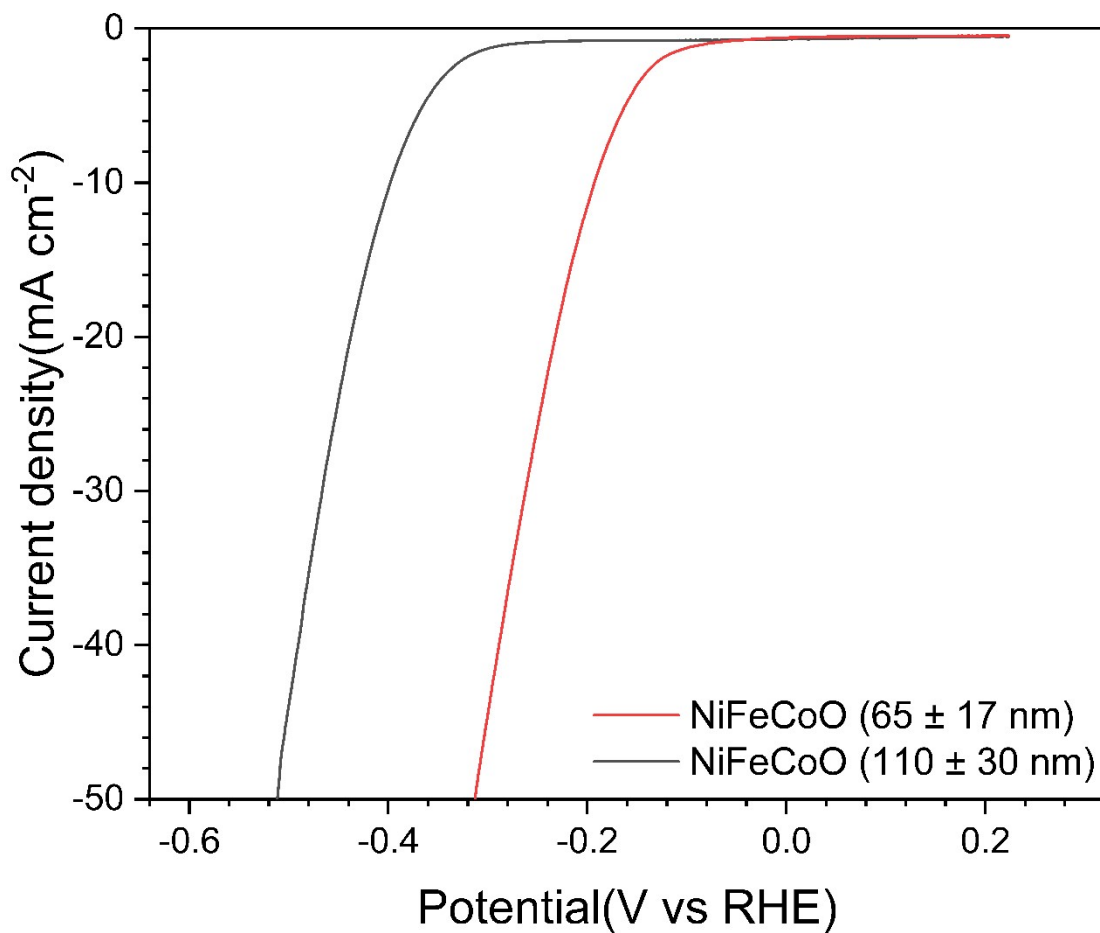

**Figure S26.** Polarization curves for NiFeCoO samples with different fiber diameters in 1.0 M KOH.

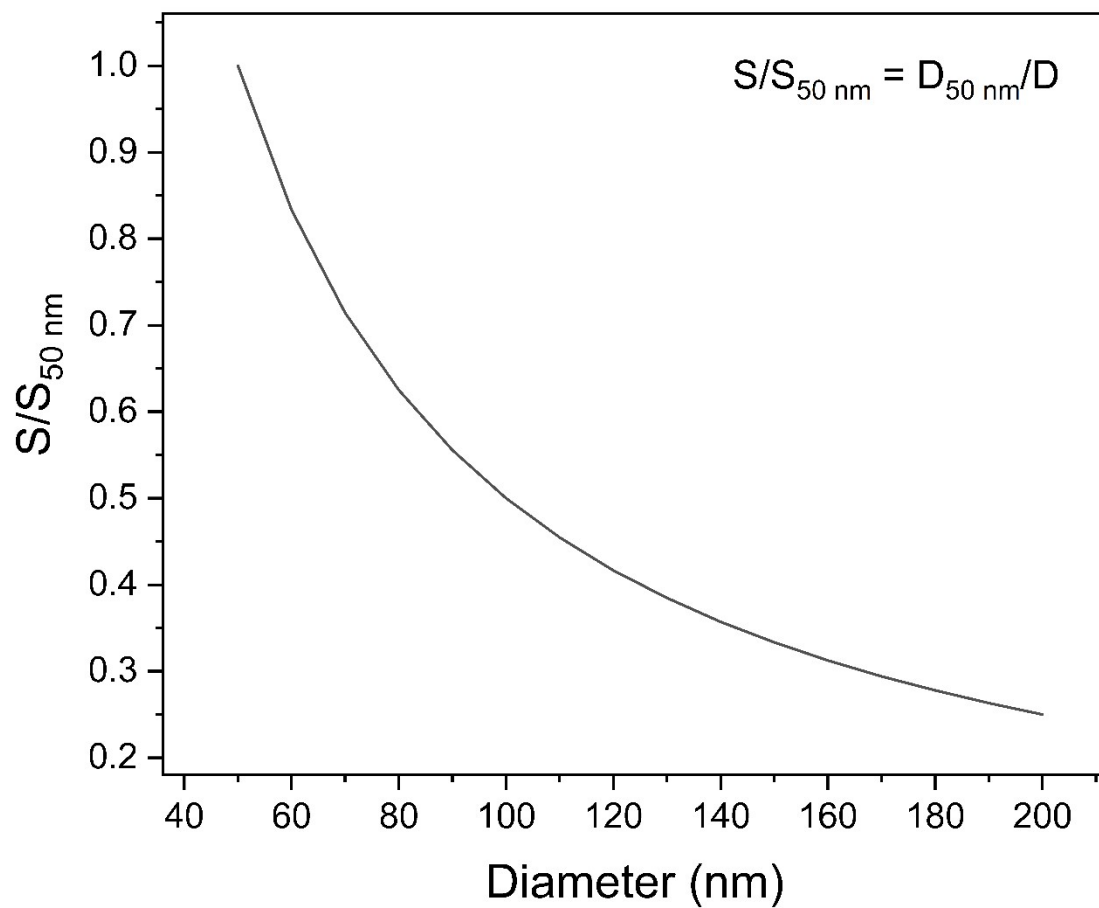

**Figure S27.** The relationship between specific surface area (compared to the surface area of fibers with diameter of 50 nm,  $S_{50 \text{ nm}}$ ) and fiber diameter.

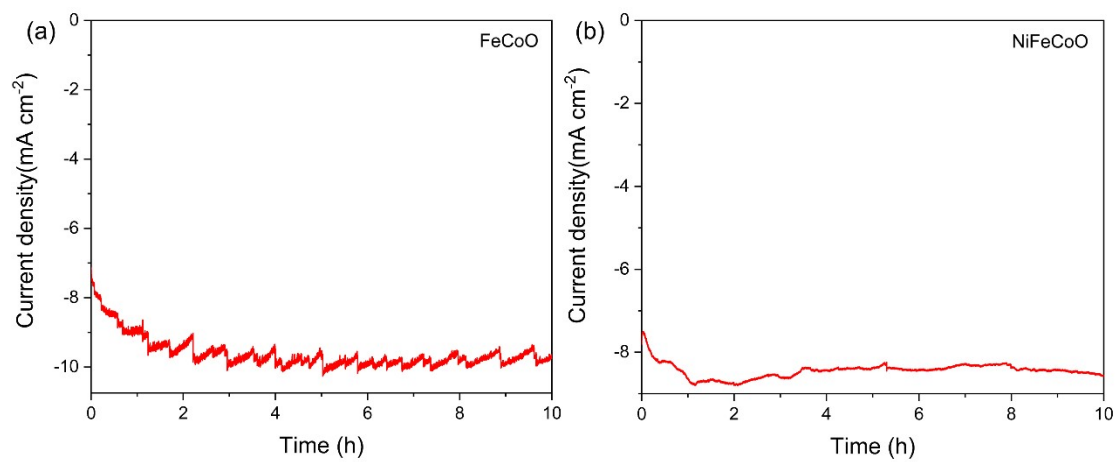

**Figure S28.** Chronopotentiometric curves for (a) FeCoO and (b) NiFeCoO sample in 1.0 M KOH.

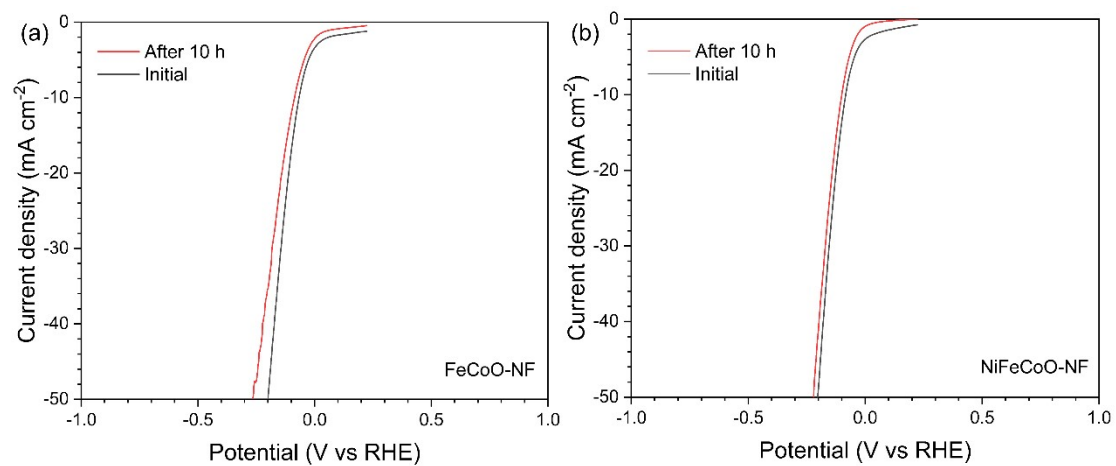

**Figure S29.** Polarization curves for (a) FeCoO-NF and (b) NiFeCoO-NF sample in 1.0 M KOH after 10 h operation.

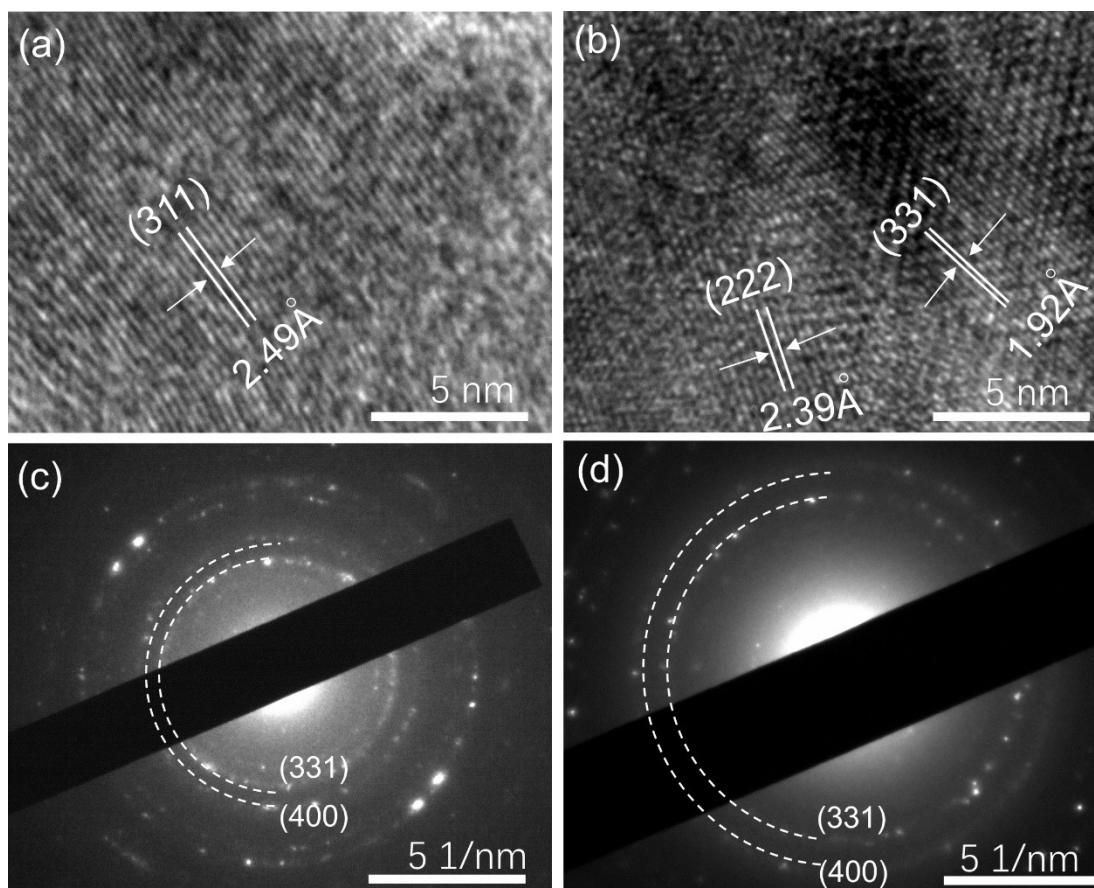

**Figure S30.** HRTEM images of (a) FeCoO and (b) NiFeCoO samples. SAED of (c) FeCoO and (d) NiFeCoO samples after 10 hours of electrochemical testing.

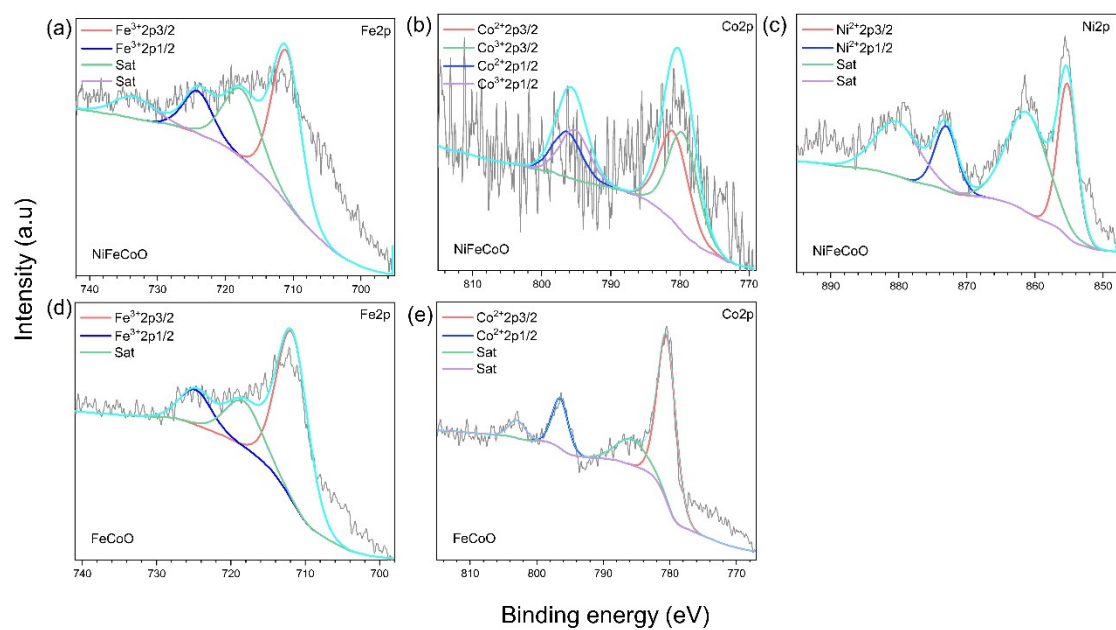

**Figure S31.** After 10 hours of electrochemical testing: (a-c) Fe 2p, Co 2p and Ni 2p high-resolution XPS spectra of the NiFeCoO sample. (d-e) Fe 2p and Co 2p high-resolution XPS spectra of the FeCoO sample.



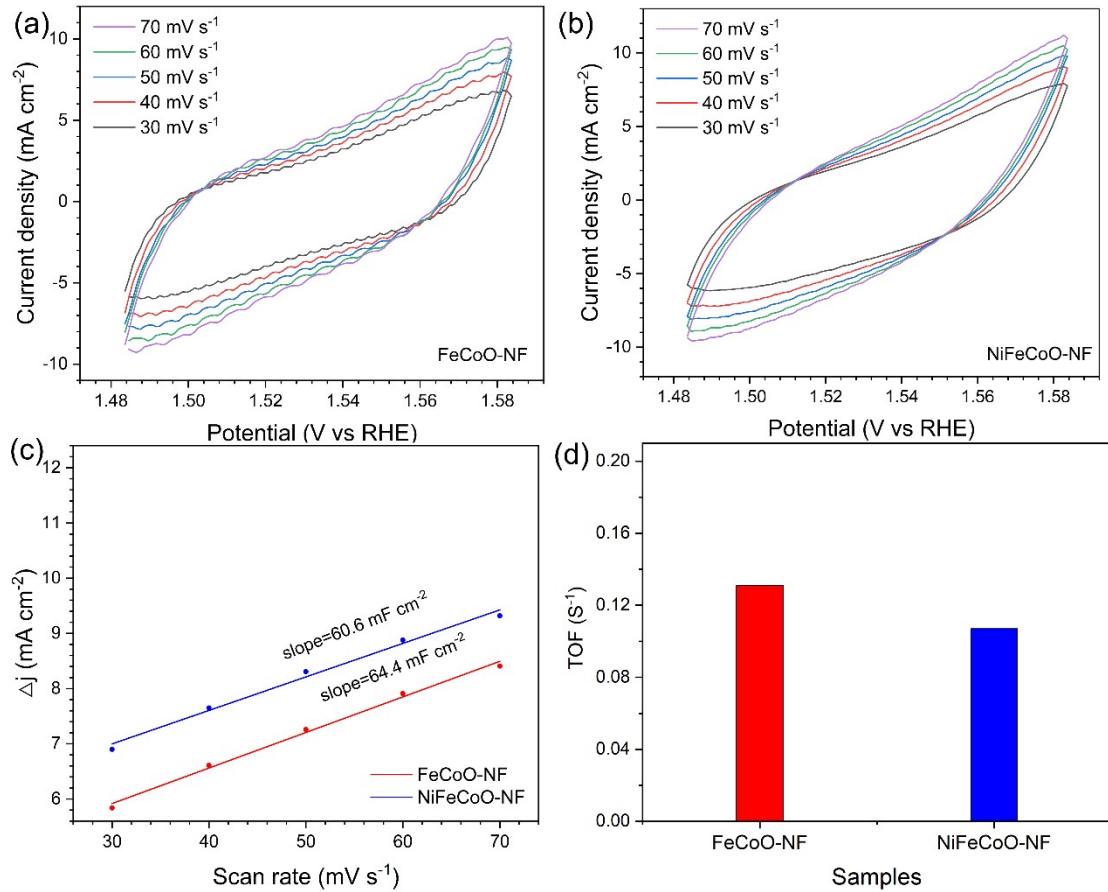

**Figure S32.** (a-b) CV curves of FeCoO-NF and NiFeCoO-NF samples at various scan rates (30, 40, 50, 60, and 70  $\text{mV s}^{-1}$ ) in the potential range of 1.48~1.58 V (vs RHE). (c) Scan rate dependence of the current densities of FeCoO-NF and NiFeCoO-NF at 1.53 V vs. RHE. (d) TOF (at an overpotential of 100 mV) for FeCoO-NF and NiFeCoO-NF samples.

Assuming a one-electron process for both reduction and oxidation, the upper limit of active sites for FeCoO-NF and NiFeCoO-NF can be calculated from CV according to the follow Equation (S1) :

$$n = \frac{Q}{2F} \tag{S1}$$

where  $n$  is the number of active sites,  $F$  is the Faraday constant, and  $Q$  is the whole charge of CV curve at  $50 \text{ mV s}^{-1}$ , respectively.

Assuming that all of active sites were entirely accessible to the electrolyte, the following formula was used to calculate TOF (Equation (S2)):

$$TOF = \frac{I}{2nF} \quad (S2)$$

where F and n are the Faraday constant and the number of active sites, respectively; I is the current of LSV curves.

**Table S1.** Summary of the HER catalytic activity of representative catalysts.

| Catalysts                                           | $\eta_{10}$<br>[mA cm <sup>-2</sup> ] | Tafel slope<br>[mA cm <sup>-2</sup> ] | Ref       |
|-----------------------------------------------------|---------------------------------------|---------------------------------------|-----------|
| Co <sub>3</sub> O <sub>4</sub> nanoarray            | 73                                    | 85                                    | [1]       |
| NiO <sub>x</sub> @BCNTs                             | 79                                    | 119                                   | [2]       |
| Co/ Co <sub>3</sub> O <sub>4</sub>                  | 90                                    | 44                                    | [3]       |
| Ni/NiFe-LDO                                         | 29                                    | 82                                    | [4]       |
| NiO/Ni heterostructures                             | 88                                    | 115                                   | [5]       |
| P-Fe <sub>3</sub> O <sub>4</sub> /IF                | 42                                    | 41.9                                  | [6]       |
| FeCoO-NF                                            | 205                                   | 118                                   | [7]       |
| CoFeNi-O                                            | 57.6                                  | 40.7                                  | [8]       |
| CoO <sub>x</sub> @CN                                | 232                                   | 115                                   | [9]       |
| Ni-Fe NPs (Ni <sub>5</sub> Fe <sub>1</sub> )        | 46                                    | 58                                    | [10]      |
| P-NCO NWs/NF                                        | 55                                    | 144.92                                | [11]      |
| NiFe/NiCo <sub>2</sub> O <sub>4</sub> /NF           | 105                                   | 88                                    | [12]      |
| S-CoO NRs                                           | 73                                    | 82                                    | [13]      |
| NG5-Ar                                              | 190                                   | 45                                    | [14]      |
| NiO/Ni-CNT                                          | 80                                    | 82                                    | [15]      |
| CoO/Fe <sub>3</sub> O <sub>4</sub>                  | 220                                   | 73                                    | [16]      |
| Ni <sub>2</sub> P/ NiCo <sub>2</sub> O <sub>4</sub> | 45                                    | 45                                    | [17]      |
| NiFe <sub>2</sub> O <sub>4</sub>                    | 300                                   | 125                                   | [18]      |
| NP-NiCo <sub>2</sub> O <sub>4</sub>                 | 370                                   | 123                                   | [19]      |
| Ni/Co <sub>3</sub> O <sub>4</sub>                   | 145                                   | 109                                   | [20]      |
| Ni/NiO/Fe <sub>3</sub> O <sub>4</sub>               | 206                                   | 57                                    | [21]      |
| NiCo <sub>2</sub> O <sub>4</sub> NSs                | 180                                   | 63                                    | [22]      |
| Co/CoO                                              | 158                                   | 68                                    | [23]      |
| NiFeCoO-NF                                          | 42                                    | 56                                    | This work |
| FeCoO-NF                                            | 66                                    | 130                                   | This work |

**Table S2.** The average diameter of the FeO, NiO, FeCoO, FeNiO, CoNiO, and NiFeCoO nanofibers.

| Sample  | Average diameter (nm) |
|---------|-----------------------|
| NiFeCoO | $65 \pm 17$           |
| FeCoO   | $85 \pm 27$           |
| FeNiO   | $75 \pm 20$           |
| CoNiO   | $85 \pm 30$           |
| FeO     | $75 \pm 20$           |
| NiO     | $95 \pm 26$           |

**Table S3.** Element molar ratio of binary and ternary sample in EDX spectrum and XPS survey spectrum.

| Sample  | EDX spectrum<br>element molar ratio | XPS survey spectrum<br>element molar ratio |
|---------|-------------------------------------|--------------------------------------------|
| NiFeCoO | Fe:Co:Ni = 1:1.22:2.36              | Fe:Co:Ni = 1.16:1.31:1                     |
| FeCoO   | Fe:Co = 1.05:1                      | Fe:Co = 1:1.39                             |
| FeNiO   | Fe:Ni = 1:2.24                      | Fe:Ni = 1.66:1                             |
| CoNiO   | Co:Ni = 1:2.15                      | Co:Ni = 1:1.06                             |

**Table S4.** The summary of electrochemical properties of as-fabricated samples and Pt for HER in 1 M KOH.

| Sample  | $\eta_{10}^{\text{a}}$<br>[mV] | $R_s$<br>[ $\Omega$ ] | $R_{\text{ct}}$<br>[ $\Omega$ ] |
|---------|--------------------------------|-----------------------|---------------------------------|
| NiFeCoO | 192.4                          | 6.42                  | 37.78                           |
| FeCoO   | 124.4                          | 6.55                  | 25.86                           |
| FeNiO   | 397.4                          | 6.07                  | 344.63                          |
| CoNiO   | 465.4                          | 6.32                  | 442.28                          |
| Pt      | 66                             | 1.19                  | 1.38                            |

$\eta_{10}^{\text{a}}$ : Overpotential (mV vs RHE) needed to reach a current density of  $-10 \text{ mA cm}^{-2}$ .

**Table S5.** The summary of electrochemical properties of NiFeCoO-NF, Ni foam and FeCoO-NF for HER in 1 M KOH.

| Sample     | $\eta_{10}^{\text{a}}$<br>[mV] | $R_s$<br>[ $\Omega$ ] | $R_{\text{ct}}$<br>[ $\Omega$ ] |
|------------|--------------------------------|-----------------------|---------------------------------|
| NiFeCoO-NF | 82                             | 7.54                  | 12.1                            |
| Ni foam    | 172.4                          | 6.78                  | 17.4                            |
| FeCoO-NF   | 66                             | 7.18                  | 7.91                            |

$\eta_{10}^{\text{a}}$ : Overpotential (mV vs RHE) needed to reach a current density of  $-10 \text{ mA cm}^{-2}$ .

**Table S6.** The summary of electrochemical properties of NiFeCoO-NF, Ni foam, FeCoO-NF and Pt for HER in 0.25 M Na<sub>2</sub>S/0.35 M Na<sub>2</sub>SO<sub>3</sub>.

| Sample     | $\eta_{10}^a$<br>[mV] | $R_s$<br>[ $\Omega$ ] | $R_{ct}$<br>[ $\Omega$ ] |
|------------|-----------------------|-----------------------|--------------------------|
| NiFeCoO-NF | /                     | 8.04                  | 13.02                    |
| Ni foam    | /                     | 7.81                  | 39.08                    |
| FeCoO-NF   | /                     | 7.50                  | 9.18                     |
| Pt         | /                     | 3.59                  | 3.66                     |

$\eta_{10}^a$ : Overpotential (mV vs RHE) needed to reach a current density of -10 mA cm<sup>-2</sup>.



- [1] L. Yang, H. Zhou, X. Qin, X. Guo, G. Cui, A.M. Asiri, X. Sun, Cathodic electrochemical activation of  $\text{Co}_3\text{O}_4$  nanoarrays: a smart strategy to significantly boost the hydrogen evolution activity, *Chem. Commun. (Camb)*. 54 (2018), 2150-2153, <http://dx.doi.org/10.1039/c7cc09416g>.
- [2] J. Wang, S. Mao, Z. Liu, Z. Wei, H. Wang, Y. Chen, Y. Wang, Dominating role of Ni(0) on the interface of Ni/NiO for enhanced hydrogen evolution reaction, *ACS. Appl. Mater. Interfaces*. 9 (2017), 7139-7147, <http://dx.doi.org/10.1021/acsami.6b15377>.
- [3] X. Yan, L. Tian, M. He, X. Chen, Three-dimensional crystalline/amorphous Co/ $\text{Co}_3\text{O}_4$  core/shell nanosheets as efficient electrocatalysts for the hydrogen evolution reaction, *Nano. Lett.* 15 (2015), 6015-6021, <http://dx.doi.org/10.1021/acs.nanolett.5b02205>.
- [4] Y. Tian, A. Huang, Z. Wang, M. Wang, Q. Wu, Y. Shen, Q. Zhu, Y. Fu, M. Wen, Two-dimensional hetero-nanostructured electrocatalyst of Ni/NiFe-layered double oxide for highly efficient hydrogen evolution reaction in alkaline medium, *Chem. Eng. J.* 426 (2021), <http://dx.doi.org/10.1016/j.cej.2021.131827>.
- [5] E.C. Lovell, X. Lu, Q. Zhang, J. Scott, R. Amal, From passivation to activation - tunable nickel/nickel oxide for hydrogen evolution electrocatalysis, *Chem. Commun. (Camb)*. 56 (2020), 1709-1712, <http://dx.doi.org/10.1039/c9cc07486d>.
- [6] J. Zhang, X. Shang, H. Ren, J. Chi, H. Fu, B. Dong, C. Liu, Y. Chai, Modulation of inverse spinel  $\text{Fe}_3\text{O}_4$  by phosphorus doping as an industrially promising electrocatalyst for hydrogen evolution, *Adv. Mater.* 31 (2019), e1905107, <http://dx.doi.org/10.1002/adma.201905107>.
- [7] H.A. Bandal, A.R. Jadhav, A.H. Tamboli, H. Kim, Bimetallic iron cobalt oxide self-supported on Ni-Foam: An efficient bifunctional electrocatalyst for oxygen and hydrogen evolution reaction, *Electrochim. Acta*. 249 (2017), 253-262, <http://dx.doi.org/10.1016/j.electacta.2017.07.178>.
- [8] L. Han, L. Guo, C. Dong, C. Zhang, H. Gao, J. Niu, Z. Peng, Z. Zhang, Ternary mesoporous cobalt-iron-nickel oxide efficiently catalyzing oxygen/hydrogen evolution reactions and overall water splitting, *Nano. Research*. 12 (2019), 2281-2287, <http://dx.doi.org/10.1007/s12274-019-2389-5>.
- [9] H. Jin, J. Wang, D. Su, Z. Wei, Z. Pang, Y. Wang, In situ cobalt-cobalt oxide/N-doped carbon hybrids as superior bifunctional electrocatalysts for hydrogen and oxygen evolution, *J. Am. Chem. Soc.* 137 (2015), 2688-2694, <http://dx.doi.org/10.1021/ja5127165>.
- [10] B.H.R. Suryanto, Y. Wang, R.K. Hocking, W. Adamson, C. Zhao, Overall electrochemical splitting of water at the heterogeneous interface of nickel and iron oxide, *Nat. Commun.* 10 (2019), 5599, <http://dx.doi.org/10.1038/s41467-019-13415-8>.
- [11] W. Chu, Z. Shi, Y. Hou, D. Ma, X. Bai, Y. Gao, N. Yang, Trifunctional of phosphorus-doped  $\text{NiCo}_2\text{O}_4$  nanowire materials for asymmetric supercapacitor, oxygen evolution reaction, and hydrogen evolution reaction, *ACS. Appl. Mater. Interfaces*. 12 (2020), 2763-2772, <http://dx.doi.org/10.1021/acsami.9b13182>.
- [12] C. Xiao, Y. Li, X. Lu, C. Zhao, Bifunctional porous NiFe/ $\text{NiCo}_2\text{O}_4$ /Ni Foam electrodes with triple hierarchy and double synergies for efficient whole cell water splitting, *Adv. Funct. Mater.* 26 (2016), 3515-3523, <http://dx.doi.org/10.1002/adfm.201505302>.
- [13] T. Ling, D.Y. Yan, H. Wang, Y. Jiao, Z. Hu, Y. Zheng, L. Zheng, J. Mao, H. Liu, X.W.

- Du, M. Jaroniec, S.Z. Qiao, Activating cobalt(II) oxide nanorods for efficient electrocatalysis by strain engineering, *Nat. Commun.* 8 (2017), 1509, <http://dx.doi.org/10.1038/s41467-017-01872-y>.
- [14] H.H. El-Maghrabi, A.A. Nada, M.F. Bekheet, S. Roualdes, W. Riedel, I. Iatsunskyi, E. Coy, A. Gurlo, M. Bechelany, Coaxial nanofibers of nickel/gadolinium oxide/nickel oxide as highly effective electrocatalysts for hydrogen evolution reaction, *J. Colloid. Interface. Sci.* 587 (2021), 457-466, <http://dx.doi.org/10.1016/j.jcis.2020.11.103>.
- [15] M. Gong, W. Zhou, M.C. Tsai, J. Zhou, M. Guan, M.C. Lin, B. Zhang, Y. Hu, D.Y. Wang, J. Yang, S.J. Pennycook, B.J. Hwang, H. Dai, Nanoscale nickel oxide/nickel heterostructures for active hydrogen evolution electrocatalysis, *Nat. Commun.* 5 (2014), 4695, <http://dx.doi.org/10.1038/ncomms5695>.
- [16] W. Adamson, X. Bo, Y.B. Li, B.H.R. Suryanto, X.J. Chen, C. Zhao, Co-Fe binary metal oxide electrocatalyst with synergistic interface structures for efficient overall water splitting, *Catal. Today.* 351 (2020), 44-49, <http://dx.doi.org/10.1016/j.cattod.2019.01.060>.
- [17] L.Y. Wang, C.D. Gu, X. Ge, J.L. Zhang, H.Y. Zhu, J.P. Tu, Anchoring Ni<sub>2</sub>P sheets on NiCo<sub>2</sub>O<sub>4</sub> nanocone arrays as optimized bifunctional electrocatalyst for water splitting, *Adv. Mater. Interfaces.* 4 (2017), <http://dx.doi.org/ARTN170048110.1002/admi.201700481>.
- [18] N. Dalai, B. Mohanty, A. Mitra, B. Jena, Highly active ternary nickel-iron oxide as bifunctional catalyst for electrochemical water splitting, *Chemistryselect.* 4 (2019), 7791-7796, <http://dx.doi.org/10.1002/slct.201901465>.
- [19] R. Elakkiya, R. Ramkumar, G. Maduraiveeran, Flower-like nickel-cobalt oxide nanomaterials as bi-functional catalyst for electrochemical water splitting, *Mater. Res Bull.* 116 (2019), 98-105, <http://dx.doi.org/10.1016/j.materresbull.2019.04.016>.
- [20] M.S. Riaz, S.W. Zhao, C.L. Dong, M.J. Iqbal, Y.T. Zhao, F.Q. Huang, Spherical sacrificial ZnO template-derived hybrid Ni/Co<sub>3</sub>O<sub>4</sub> cubes as efficient bifunctional electrocatalyst for overall water splitting, *Energy. Technol-Ger.* 8 (2020), <http://dx.doi.org/ARTN190131010.1002/ente.201901310>.
- [21] Y.M. Xie, X.F. Wang, K. Tang, Q. Li, C.L. Yan, Blending Fe<sub>3</sub>O<sub>4</sub> into a Ni/NiO composite for efficient and stable bifunctional electrocatalyst, *Electrochim. Acta.* 264 (2018), 225-232, <http://dx.doi.org/10.1016/j.electacta.2018.01.136>.
- [22] L.M. Tao, Y.B. Li, M. Li, G.Y. Gao, X. Xiao, M.K. Wang, X.X. Jiang, X.W. Lv, Q.W. Li, S.S. Zhang, Z.X. Zhao, C. Zhao, Y. Shen, Nanostructured nickel cobaltite antispinel as bifunctional electrocatalyst for overall water splitting, *J. Phys. Chem. C.* 121 (2017), 25888-25897, <http://dx.doi.org/10.1021/acs.jpcc.7b08814>.
- [23] J. Cao, X.B. Chen, H.C. Li, J.X. Pu, L.M. Liu, L. Ma, K.C. Zhou, Z.J. Zhang, Q.P. Wei, F.H. Luo, A Co/CoO hybrid rooted on carbon cloth as an efficient electrocatalyst for the hydrogen evolution reaction in alkaline solution, *Sustain. Energ. Fuels.* 4 (2020), 1924-1932, <http://dx.doi.org/10.1039/c9se01128e>.
